# Supplementary material
Source: Springer Nature journal article supplement (https://www.springermedizin.de/resource/supplementary/13014_2008_146_MOESM4_ESM.pdf/9633142)

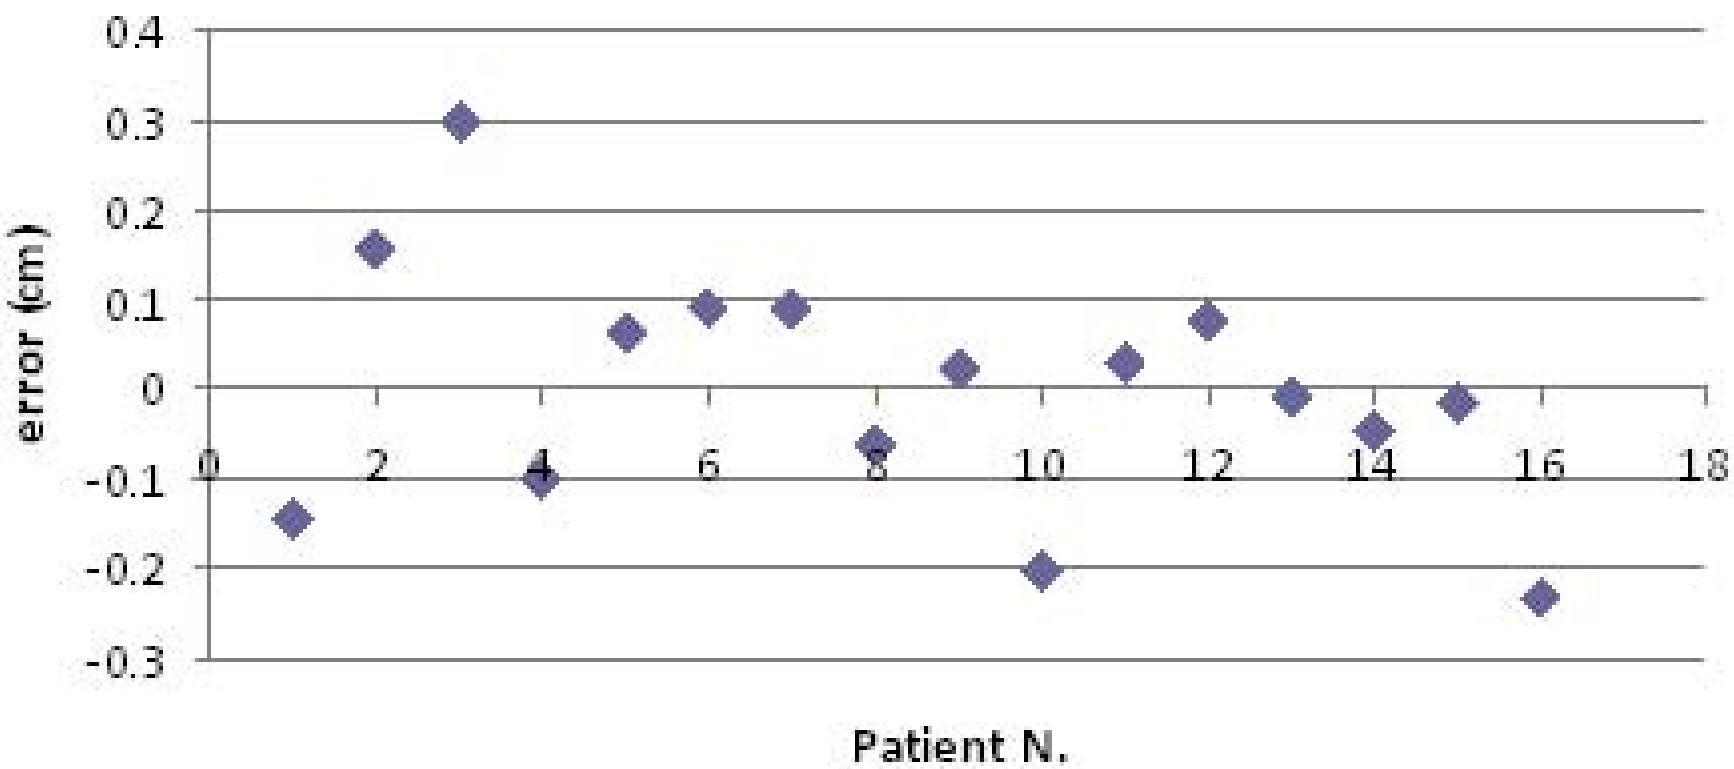

Supplement: MOESM4 [file 9633142]
